# Supplementary material for: Trends in Hospital Admission for Diabetic Ketoacidosis in Adults With Type 1 and Type 2 Diabetes in England, 1998–2013: A Retrospective Cohort Study
Source: Oxford University Press journal article supplement (doi:10.2337/dc17-1583), 2018-01-31

## SUPPLEMENTARY DATA

**Supplementary Table 1.** Age-standardized incidence of hospital admission for diabetic ketoacidosis per 1000 person years in T1DM adults\*

|                                              | All years | 1998   | 1999       | 2000       | 2001       | 2002       | 2003       | 2004  | 2005       | 2006       | 2007       | 2008       | 2009       | 2010       | 2011       | 2012       | 2013       |
|----------------------------------------------|-----------|--------|------------|------------|------------|------------|------------|-------|------------|------------|------------|------------|------------|------------|------------|------------|------------|
| Hospital admissions                          | 4346      | 93     | 124        | 161        | 188        | 211        | 226        | 205   | 244        | 312        | 364        | 377        | 381        | 396        | 347        | 364        | 353        |
| Person years                                 | 121258    | 3972   | 4957       | 6073       | 6733       | 7384       | 7701       | 7921  | 8100       | 8316       | 8573       | 8684       | 8797       | 8746       | 8551       | 8439       | 8312       |
| Age standardized incidence                   |           |        |            |            |            |            |            |       |            |            |            |            |            |            |            |            |            |
| Total                                        | 35.84     | 24.94  | 27.04      | 28.56      | 30.08      | 30.03      | 30.61      | 26.81 | 30.79      | 37.76      | 42.08      | 42.75      | 42.18      | 43.6       | 39.08      | 41.31      | 39.13      |
| Age groups, years                            |           |        |            |            |            |            |            |       |            |            |            |            |            |            |            |            |            |
| 18-24                                        | 115.74    | 90.48  | 101.9<br>6 | 119.7<br>6 | 116.9<br>4 | 92.90      | 100.8<br>7 | 94.30 | 81.45      | 106.7<br>1 | 126.3<br>3 | 121.3<br>8 | 152.8<br>0 | 159.4<br>8 | 113.8<br>5 | 104.3<br>5 | 116.7<br>9 |
| 25-34                                        | 53.78     | 19.00  | 26.65      | 33.69      | 39.85      | 43.17      | 45.54      | 42.64 | 59.32      | 57.89      | 68.71      | 70.89      | 68.39      | 61.62      | 62.26      | 73.29      | 49.55      |
| 35-49                                        | 27.33     | 21.62  | 24.10      | 15.34      | 21.34      | 23.11      | 23.99      | 15.98 | 20.14      | 27.27      | 35.08      | 38.16      | 26.81      | 32.16      | 34.72      | 33.95      | 30.03      |
| ≥50                                          | 16.91     | 15.63  | 12.84      | 16.69      | 13.42      | 15.74      | 13.62      | 13.50 | 15.43      | 21.93      | 17.03      | 16.31      | 18.31      | 18.95      | 15.52      | 18.92      | 24.54      |
| Gender                                       |           |        |            |            |            |            |            |       |            |            |            |            |            |            |            |            |            |
| Male                                         | 30.84     | 23.77  | 22.25      | 20.65      | 24.49      | 25.5       | 28.42      | 21.54 | 29.85      | 33.73      | 33.32      | 35.32      | 33.67      | 40.12      | 35.58      | 34.08      | 35.61      |
| Female                                       | 42.65     | 26.35  | 32.94      | 38.35      | 37.96      | 35.89      | 33.65      | 33.47 | 31.96      | 43.47      | 54.13      | 52.94      | 54.74      | 48.99      | 43.77      | 50.59      | 43.91      |
| Duration of recorded diabetes history, years |           |        |            |            |            |            |            |       |            |            |            |            |            |            |            |            |            |
| <1                                           | 145.30    | 139.08 | 82.59      | 74.71      | 53.77      | 124.8<br>4 | 136.4<br>9 | 88.76 | 152.9<br>3 | 158.8<br>2 | 170.3<br>5 | 150.0<br>6 | 176.3<br>4 | 229.6<br>3 | 270.8<br>4 | 332.0<br>6 | 131.7<br>8 |
| 1-9                                          | 34.98     | 29.01  | 37.79      | 31.52      | 33.64      | 23.00      | 31.80      | 24.68 | 24.28      | 30.79      | 37.41      | 38.05      | 42.48      | 45.08      | 43.52      | 45.99      | 39.14      |
| 10-19                                        | 36.60     | 15.52  | 16.47      | 25.88      | 28.62      | 34.57      | 29.19      | 27.68 | 32.02      | 46.54      | 46.79      | 46.33      | 40.75      | 43.69      | 39.12      | 37.18      | 45.32      |
| ≥20                                          | 27.96     | 14.81  | 25.69      | 20.71      | 15.00      | 34.24      | 21.11      | 21.35 | 23.54      | 20.80      | 30.32      | 37.15      | 33.49      | 30.93      | 25.13      | 28.31      | 40.74      |
| Charlson score                               |           |        |            |            |            |            |            |       |            |            |            |            |            |            |            |            |            |
| =1                                           | 31.47     | 24.05  | 24.98      | 28.57      | 21.72      | 26.26      | 28.32      | 26.33 | 26.31      | 33.23      | 35.22      | 36.68      | 37.47      | 39.48      | 36.93      | 37.39      | 36.20      |
| =2                                           | 40.62     | 19.21  | 32.21      | 41.82      | 57.72      | 29.84      | 27.34      | 20.15 | 34.04      | 44.23      | 51.89      | 40.25      | 64.88      | 53.22      | 47.74      | 53.89      | 46.72      |
| =3                                           | 34.89     | 36.69  | 17.17      | 15.86      | 28.51      | 36.59      | 44.64      | 44.01 | 36.17      | 34.52      | 46.87      | 37.97      | 40.17      | 30.25      | 30.85      | 32.21      | 34.36      |
| ≥4                                           | 50.17     | 108.47 | 15.99      | 37.51      | 38.07      | 49.19      | 31.82      | 30.94 | 47.99      | 48.79      | 50.16      | 78.22      | 37.82      | 67.64      | 43.04      | 42.45      | 56.61      |
| Region                                       |           |        |            |            |            |            |            |       |            |            |            |            |            |            |            |            |            |
| North East                                   | 42.50     | 13.66  | 13.04      | 50.42      | 53.40      | 37.10      | 65.89      | 62.43 | 18.54      | 20.17      | 48.34      | 44.16      | 59.78      | 61.57      | 38.07      | 52.71      | 50.02      |
| North West                                   | 50.11     | 56.68  | 36.36      | 44.14      | 56.31      | 57.54      | 34.53      | 55.11 | 55.71      | 52.94      | 46.31      | 69.80      | 44.77      | 47.87      | 50.88      | 48.91      | 50.03      |
| Yorkshire&The Humber                         | 35.28     | 16.91  | 21.52      | 3.08       | 8.42       | 16.14      | 31.22      | 31.71 | 20.98      | 34.21      | 53.31      | 57.79      | 58.72      | 69.78      | 33.82      | 47.04      | 51.31      |
| East Midlands                                | 32.19     | 4.58   | 20.32      | 37.20      | 23.16      | 22.56      | 28.36      | 28.67 | 9.42       | 56.12      | 26.98      | 42.26      | 51.21      | 62.15      | 43.70      | 53.05      | 42.47      |
| West Midlands                                | 34.19     | 16.23  | 17.60      | 24.74      | 33.37      | 26.93      | 34.94      | 19.69 | 17.63      | 35.82      | 48.09      | 42.65      | 49.35      | 64.30      | 27.24      | 32.56      | 33.44      |
| East of England                              | 28.89     | 3.64   | 25.50      | 21.76      | 17.66      | 21.89      | 17.20      | 14.34 | 29.14      | 46.02      | 39.96      | 25.55      | 36.93      | 36.27      | 28.57      | 31.17      | 50.14      |
| South West                                   | 36.54     | 34.13  | 47.25      | 22.86      | 25.21      | 32.91      | 30.37      | 28.81 | 29.59      | 24.24      | 44.22      | 49.37      | 52.64      | 41.85      | 43.38      | 34.22      | 32.69      |
| South Central                                | 29.63     | 18.85  | 22.36      | 39.61      | 30.56      | 28.04      | 26.85      | 19.33 | 28.90      | 25.69      | 31.07      | 26.53      | 36.40      | 29.60      | 32.79      | 42.36      | 24.95      |
| London                                       | 35.82     | 18.36  | 13.32      | 30.66      | 20.39      | 30.26      | 33.10      | 21.32 | 40.74      | 45.23      | 52.11      | 37.43      | 32.28      | 43.93      | 50.53      | 37.52      | 34.64      |
| South East Coast                             | 32.53     | 32.07  | 38.41      | 20.56      | 32.60      | 17.28      | 35.94      | 14.73 | 23.54      | 29.63      | 33.04      | 38.94      | 29.21      | 30.92      | 38.23      | 50.01      | 48.31      |

\*The standard population for calculating age standardized incidence was the entire cohort of T1DM adults during the study period, according to the following age categories: 18-24, 25-34, 35-49, and ≥50 years.

SUPPLEMENTARY DATA

**Supplementary Table 2.** Age-standardized incidence of hospital admission for diabetic ketoacidosis per 1000 person years in T2DM adults\*

|                                                    | All years | 1998  | 1999  | 2000  | 2001  | 2002  | 2003  | 2004  | 2005  | 2006  | 2007   | 2008   | 2009   | 2010   | 2011   | 2012   | 2013   |
|----------------------------------------------------|-----------|-------|-------|-------|-------|-------|-------|-------|-------|-------|--------|--------|--------|--------|--------|--------|--------|
| Hospital admissions                                | 1148      | 16    | 17    | 24    | 31    | 44    | 46    | 53    | 52    | 71    | 100    | 101    | 111    | 118    | 112    | 131    | 121    |
| Person years                                       | 1342896   | 22930 | 30506 | 40743 | 49515 | 59977 | 68910 | 77989 | 86773 | 95122 | 102937 | 109022 | 114894 | 118783 | 120684 | 121817 | 122295 |
| Age standardized incidence                         |           |       |       |       |       |       |       |       |       |       |        |        |        |        |        |        |        |
| Total                                              | 0.85      | 0.70  | 0.56  | 0.60  | 0.63  | 0.73  | 0.67  | 0.68  | 0.60  | 0.75  | 0.97   | 0.92   | 0.96   | 0.99   | 0.92   | 1.07   | 0.98   |
| Age groups, years                                  |           |       |       |       |       |       |       |       |       |       |        |        |        |        |        |        |        |
| 18-49                                              | 2.05      | 0.89  | 0.67  | 1.25  | 1.58  | 0.95  | 1.22  | 2.13  | 1.36  | 1.33  | 2.45   | 2.41   | 3.14   | 2.28   | 2.22   | 2.65   | 2.22   |
| 50-64                                              | 0.81      | 0.41  | 0.31  | 0.63  | 0.59  | 0.76  | 0.67  | 0.59  | 0.60  | 0.82  | 1.01   | 1.12   | 1.07   | 0.84   | 0.81   | 0.87   | 0.73   |
| ≥65                                                | 0.66      | 0.82  | 0.67  | 0.46  | 0.48  | 0.68  | 0.57  | 0.46  | 0.45  | 0.60  | 0.67   | 0.54   | 0.49   | 0.83   | 0.74   | 0.88   | 0.88   |
| Gender                                             |           |       |       |       |       |       |       |       |       |       |        |        |        |        |        |        |        |
| Male                                               | 0.67      | 0.26  | 0.37  | 0.77  | 0.60  | 0.53  | 0.45  | 0.60  | 0.42  | 0.51  | 0.84   | 0.76   | 0.74   | 0.72   | 0.67   | 0.84   | 0.80   |
| Female                                             | 1.09      | 1.24  | 0.75  | 0.37  | 0.69  | 0.93  | 0.94  | 0.77  | 0.83  | 1.04  | 1.10   | 1.14   | 1.22   | 1.32   | 1.26   | 1.38   | 1.26   |
| Duration of recorded diabetes history, years       |           |       |       |       |       |       |       |       |       |       |        |        |        |        |        |        |        |
| <1                                                 | 2.28      | 2.38  | 2.50  | 2.25  | 2.15  | 2.25  | 1.68  | 1.70  | 2.33  | 1.93  | 2.78   | 2.39   | 3.36   | 2.55   | 2.34   | 3.52   | 1.14   |
| 1-4                                                | 0.35      | 0.34  | 0.35  | 0.55  | 0.45  | 0.27  | 0.24  | 0.09  | 0.21  | 0.19  | 0.27   | 0.35   | 0.44   | 0.34   | 0.34   | 0.50   | 0.73   |
| 5-9                                                | 0.71      | 0.45  | 0.31  | 0.16  | 0.23  | 0.77  | 0.43  | 0.71  | 0.55  | 0.88  | 0.84   | 0.89   | 0.90   | 0.77   | 0.89   | 0.60   | 0.64   |
| ≥10                                                | 1.39      | 1.19  | 0.63  | 0.53  | 0.93  | 0.99  | 1.30  | 1.89  | 0.90  | 1.16  | 1.83   | 1.41   | 1.28   | 1.75   | 1.29   | 1.65   | 1.51   |
| Charlson score                                     |           |       |       |       |       |       |       |       |       |       |        |        |        |        |        |        |        |
| =1                                                 | 0.67      | 0.62  | 0.50  | 0.46  | 0.67  | 0.96  | 0.60  | 0.39  | 0.50  | 0.50  | 0.60   | 0.66   | 1.06   | 1.02   | 0.59   | 0.58   | 0.58   |
| =2                                                 | 0.72      | 0.79  | 0.24  | 0.37  | 0.82  | 0.58  | 0.69  | 0.83  | 0.68  | 0.87  | 0.58   | 0.69   | 0.78   | 0.98   | 0.72   | 0.73   | 0.71   |
| =3                                                 | 0.85      | 0.88  | 1.21  | 1.41  | 0.21  | 0.21  | 0.64  | 0.82  | 0.77  | 0.84  | 0.79   | 1.17   | 1.07   | 0.50   | 0.69   | 1.17   | 0.97   |
| ≥4                                                 | 1.24      | 0.52  | 0.58  | 0.56  | 0.89  | 0.87  | 1.21  | 1.58  | 0.53  | 0.89  | 2.08   | 1.17   | 1.16   | 1.10   | 1.35   | 1.41   | 1.35   |
| Glucose-lowering drugs                             |           |       |       |       |       |       |       |       |       |       |        |        |        |        |        |        |        |
| Sulfonylureas with or without NIGLD                | 0.34      | 0.80  | 0.28  | 0.22  | 0.34  | 0.46  | 0.33  | 0.12  | 0.27  | 0.20  | 0.39   | 0.44   | 0.29   | 0.35   | 0.27   | 0.36   | 0.44   |
| Insulin only                                       | 7.55      | 2.17  | 2.98  | 4.14  | 5.07  | 3.80  | 5.51  | 8.21  | 4.87  | 3.97  | 9.21   | 7.78   | 10.65  | 8.75   | 9.62   | 11.06  | 10.86  |
| Insulin and NIGLD                                  | 3.49      | 2.73  | 2.52  | 2.22  | 1.10  | 2.40  | 2.36  | 2.68  | 2.02  | 3.74  | 3.70   | 3.89   | 4.02   | 4.42   | 3.99   | 4.48   | 3.71   |
| Other†                                             | 0.13      | 0.14  | 0.27  | 0.28  | 0.38  | 0.30  | 0.07  | 0.03  | 0.12  | 0.17  | 0.11   | 0.10   | 0.11   | 0.08   | 0.12   | 0.10   | 0.14   |
| Region                                             |           |       |       |       |       |       |       |       |       |       |        |        |        |        |        |        |        |
| North East, Yorkshire & The Humber, East Midlands‡ | 0.50      | 0.31  | 0.45  | 0.38  | 0.68  | 0.74  | 0.52  | 0.57  | 0.62  | 0.37  | 0.78   | 0.17   | 0.27   | 0.46   | 0.42   | 1.14   | 0.17   |
| North West                                         | 0.81      | 1.43  | 0.40  | 0.45  | 0.92  | 0.68  | 0.44  | 0.31  | 0.83  | 0.89  | 1.19   | 0.45   | 1.10   | 0.94   | 0.75   | 1.00   | 0.88   |
| West Midlands                                      | 0.68      | 0.28  | 0.24  | 0.41  | 0.18  | 0.58  | 0.50  | 0.67  | 0.61  | 0.91  | 0.76   | 0.56   | 1.06   | 0.59   | 0.93   | 1.02   | 0.39   |
| East of England                                    | 0.87      | 0     | 0.97  | 1.09  | 0.33  | 1.04  | 0.82  | 0.42  | 0.47  | 0.62  | 0.50   | 1.03   | 1.05   | 1.68   | 0.92   | 1.04   | 0.95   |
| South West                                         | 0.90      | 0.35  | 0.49  | 0.35  | 0.75  | 0.45  | 0.47  | 0.89  | 0.40  | 1.43  | 1.09   | 1.04   | 0.82   | 1.30   | 0.96   | 1.13   | 0.81   |
| South Central                                      | 0.97      | 1.94  | 0.41  | 0.52  | 0.56  | 0.71  | 1.02  | 1.13  | 0.31  | 0.77  | 0.80   | 1.46   | 1.01   | 0.81   | 1.00   | 0.91   | 1.59   |
| London                                             | 1.13      | 0.73  | 1.09  | 0.57  | 0.92  | 0.76  | 0.78  | 1.18  | 0.79  | 0.45  | 1.01   | 1.44   | 1.47   | 1.17   | 1.45   | 1.44   | 1.20   |
| South East Coast                                   | 0.83      | 1.12  | 0.36  | 1.10  | 0.60  | 0.86  | 0.81  | 0.42  | 0.64  | 0.44  | 1.35   | 1.27   | 0.61   | 0.84   | 0.67   | 0.82   | 1.10   |

## SUPPLEMENTARY DATA

NIGLD, non-insulin glucose-lowering drug.

\* The standard population for calculating age standardized incidence was the entire cohort of T2DM adults during the study period, according to the following age categories: 18-49, 50-64 and  $\geq 65$  years.

† Other included self-management only and monotherapy or combination of non-insulin glucose-lowering drug (excluding sulfonylureas).

‡ Combined due to the small number of DKA hospital admissions in these three regions

**Supplementary Table 3.** Trends in hospital admission for diabetic ketoacidosis by diabetes type and subgroups

|                                              | Trend 1   |                        |         | Trend 2   |                        |      | Trend 3   |                       |       |
|----------------------------------------------|-----------|------------------------|---------|-----------|------------------------|------|-----------|-----------------------|-------|
|                                              | Period    | APC (95% CI)           | P       | Period    | APC (95% CI)           | P    | Period    | APC (95% CI)          | P     |
| <b>Type 1 diabetes</b>                       |           |                        |         |           |                        |      |           |                       |       |
| Overall                                      | 1998-2004 | 0.63 (-1.87, 3.18)     | 0.58    | 2004-2007 | 14.10 (2.34, 27.22)    | 0.02 | 2007-2013 | -1.15 (-2.71, 0.44)   | 0.13  |
| Age group, years                             |           |                        |         |           |                        |      |           |                       |       |
| 18-24                                        | 1998-2005 | -2.88 (-9.78, 4.55)    | 0.39    | 2005-2009 | 13.81 (-5.92, 37.68)   | 0.16 | 2009-2013 | -8.54 (-17.23, 1.05)  | 0.07  |
| 25-34                                        | 1998-2007 | 11.92 (7.08, 16.99)    | 0.0002  | 2007-2013 | -2.58 (-7.69, 2.82)    | 0.31 |           |                       |       |
| 35-49                                        | 1998-2013 | 4.29 (1.77, 6.88)      | 0.003   |           |                        |      |           |                       |       |
| $\geq 50$                                    | 1998-2013 | 2.79 (1.01, 4.60)      | 0.005   |           |                        |      |           |                       |       |
| Gender                                       |           |                        |         |           |                        |      |           |                       |       |
| Male                                         | 1998-2013 | 3.81 (2.43, 5.21)      | <0.0001 |           |                        |      |           |                       |       |
| Female                                       | 1998-2005 | 0.81 (-4.39, 6.28)     | 0.74    | 2005-2008 | 16.47 (-10.02, 50.76)  | 0.21 | 2008-2013 | -4.79 (-9.97, 0.70)   | 0.08  |
| Duration of recorded diabetes history, years |           |                        |         |           |                        |      |           |                       |       |
| <1                                           | 1998-2013 | 7.70 (3.61, 11.96)     | 0.001   |           |                        |      |           |                       |       |
| 1-10                                         | 1998-2005 | -4.04 (-9.89, 2.19)    | 0.17    | 2005-2009 | 14.69 (-4.00, 37.01)   | 0.11 | 2009-2013 | -1.43 (-11.93, 10.33) | 0.78  |
| 10-19                                        | 1998-2007 | 10.00 (4.60, 15.68)    | 0.002   | 2007-2013 | -2.05 (-8.01, 4.30)    | 0.48 |           |                       |       |
| $\geq 20$                                    | 1998-2013 | 5.09 (2.22, 8.04)      | 0.002   |           |                        |      |           |                       |       |
| Charlson comorbidity score                   |           |                        |         |           |                        |      |           |                       |       |
| 1                                            | 1998-2013 | 3.77 (2.58, 4.97)      | <0.0001 |           |                        |      |           |                       |       |
| 2                                            | 1998-2013 | 3.69 (0.07, 7.44)      | 0.046   |           |                        |      |           |                       |       |
| 3                                            | 1998-2000 | -27.74 (-71.74, 84.80) | 0.45    | 2000-2003 | 37.57 (-39.62, 213.41) | 0.40 | 2003-2013 | -3.34 (-6.62, 0.05)   | 0.053 |
| $\geq 4$                                     | 1998-2013 | 2.39 (-2.03, 7.01)     | 0.27    |           |                        |      |           |                       |       |
| Region                                       |           |                        |         |           |                        |      |           |                       |       |
| North East                                   | 1998-2013 | 1.78 (-2.99, 6.78)     | 0.44    |           |                        |      |           |                       |       |
| North West                                   | 1998-2013 | 0.09 (-2.00, 2.23)     | 0.93    |           |                        |      |           |                       |       |
| Yorkshire&The Humber                         | 1998-2013 | 10.44 (4.79, 16.41)    | 0.001   |           |                        |      |           |                       |       |
| East Midlands                                | 1998-2013 | 7.47 (2.01, 13.22)     | 0.01    |           |                        |      |           |                       |       |
| West Midlands                                | 1998-2013 | 4.94 (0.38, 9.71)      | 0.04    |           |                        |      |           |                       |       |
| East of England                              | 1998-2013 | 5.80 (1.48, 10.30)     | 0.01    |           |                        |      |           |                       |       |
| South West                                   | 1998-2005 | -4.69 (-12.75, 4.12)   | 0.25    | 2005-2008 | 26.54 (-25.27, 114.27) | 0.33 | 2008-2013 | -8.81 (-17.23, 0.48)  | 0.06  |
| South Central                                | 1998-2013 | 1.56 (-0.99, 4.19)     | 0.21    |           |                        |      |           |                       |       |
| London                                       | 1998-2013 | 3.75 (0.30, 7.31)      | 0.04    |           |                        |      |           |                       |       |
| South East Coast                             | 1998-2013 | 4.65 (1.40, 8.02)      | 0.008   |           |                        |      |           |                       |       |

## SUPPLEMENTARY DATA

### Type 2 diabetes

|                                                    |           |                        |         |           |                      |        |
|----------------------------------------------------|-----------|------------------------|---------|-----------|----------------------|--------|
| Overall                                            | 1998-2013 | 4.24 (2.82, 5.69)      | <0.0001 |           |                      |        |
| Age group, years                                   |           |                        |         |           |                      |        |
| 18-49                                              | 1998-2013 | 5.98 (2.18, 9.92)      | 0.004   |           |                      |        |
| 50-64                                              | 1998-2008 | 9.67 (4.61, 14.97)     | 0.001   | 2008-2013 | -6.72 (-13.66, 0.77) | 0.07   |
| ≥65                                                | 1998-2013 | 3.60 (1.00, 6.26)      | 0.01    |           |                      |        |
| Gender                                             |           |                        |         |           |                      |        |
| Male                                               | 1998-2013 | 3.64 (1.05, 6.29)      | 0.009   |           |                      |        |
| Female                                             | 1998-2013 | 4.39 (2.33, 6.49)      | 0.0004  |           |                      |        |
| Duration of recorded diabetes history, years       |           |                        |         |           |                      |        |
| <1                                                 | 1998-2013 | 1.53 (-2.27, 5.47)     | 0.41    |           |                      |        |
| 1-4                                                | 1998-2004 | -18.85 (-32.38, -2.61) | 0.03    | 2004-2013 | 14.62 (7.91, 21.74)  | 0.0004 |
| 5-9                                                | 1998-2008 | 11.11 (2.43, 20.51)    | 0.02    | 2008-2013 | -7.57 (-18.05, 4.25) | 0.18   |
| ≥10                                                | 1998-2013 | 3.42 (0.27, 6.67)      | 0.04    |           |                      |        |
| Charlson comorbidity score                         |           |                        |         |           |                      |        |
| 1                                                  | 1998-2013 | 1.36 (-2.71, 5.60)     | 0.49    |           |                      |        |
| 2                                                  | 1998-2013 | 1.55 (-1.29, 4.46)     | 0.26    |           |                      |        |
| 3                                                  | 1998-2013 | 1.39 (-3.37, 6.38)     | 0.55    |           |                      |        |
| ≥4                                                 | 1998-2013 | 3.71 (-0.86, 8.48)     | 0.10    |           |                      |        |
| Current status of glucose lowering drug use        |           |                        |         |           |                      |        |
| Sulfonylureas                                      | 1998-2013 | -0.88 (-5.06, 3.48)    | 0.67    |           |                      |        |
| Insulin only                                       | 1998-2013 | 8.09 (4.97, 11.31)     | 0.0001  |           |                      |        |
| Insulin + NIGLD                                    | 1998-2009 | 5.61 (2.86, 8.44)      | 0.0006  |           |                      |        |
| Other*                                             | 1998-2013 | -6.88 (-11.53, -1.99)  | 0.01    |           |                      |        |
| Region                                             |           |                        |         |           |                      |        |
| North East, Yorkshire & The Humber, East Midlands† | 1998-2013 | 1.45 (-4.93, 8.26)     | 0.64    |           |                      |        |
| North West                                         | 1998-2013 | 1.65 (-2.75, 6.25)     | 0.44    |           |                      |        |
| West Midlands                                      | 1998-2013 | 4.88 (-0.39, 10.43)    | 0.07    |           |                      |        |
| East of England                                    | 1998-2013 | 3.79 (-1.52, 9.39)     | 0.15    |           |                      |        |
| South West                                         | 1998-2013 | 4.34 (-0.63, 9.55)     | 0.08    |           |                      |        |
| South Central                                      | 1998-2013 | 3.51 (-1.30, 8.54)     | 0.14    |           |                      |        |
| London                                             | 1998-2013 | 4.56 (1.25, 7.97)      | 0.01    |           |                      |        |
| South East Coast                                   | 1998-2013 | 1.42 (-3.39, 6.48)     | 0.54    |           |                      |        |

Abbreviations: APC, annual percent change; CI, confidence interval; NIGLD, non-insulin glucose-lowering drug.

\* Included self-management alone (i.e., not currently taking any glucose-lowering drug), oral glucose-lowering drug monotherapy (excluding sulfonylureas) or combinations of any glucose-lowering drugs (excluding insulin and sulfonylureas).

† Combined due to the small number of DKA hospital admissions in these three regions

SUPPLEMENTARY DATA

**Supplementary Table 4.** Characteristics of adults with T1DM and T2DM in different years according to the number of hospital admission for DKA during the entire study period

|                                              | T1DM                                 |               |               |               |         | P | T2DM                                 |               |              |         |
|----------------------------------------------|--------------------------------------|---------------|---------------|---------------|---------|---|--------------------------------------|---------------|--------------|---------|
|                                              | Number of hospital admission for DKA |               |               |               | P       |   | Number of hospital admission for DKA |               |              | P       |
|                                              | 0                                    | 1             | 2             | ≥3            |         |   | 0                                    | 1             | ≥2           |         |
| <b>Year 1998</b>                             |                                      |               |               |               |         |   |                                      |               |              |         |
| N (%)                                        | 4462<br>(91.27)                      | 272<br>(5.56) | 76<br>(1.55)  | 79<br>(1.62)  |         |   | 27838<br>(99.35)                     | 145<br>(0.52) | 36<br>(0.13) |         |
| Age, years                                   | 49.0 ± 18.4                          | 44.3 ± 17.4   | 39.8 ± 17.7   | 37.8 ± 15.2   | <0.0001 |   | 66.3 ± 12.6                          | 63.0 ± 14.2   | 56.6 ± 14.6  | <0.0001 |
| Male                                         | 57.1                                 | 50.7          | 57.9          | 57.0          | 0.2     |   | 54.0                                 | 42.1          | 25.0         | <0.0001 |
| Duration of recorded diabetes history, years | 17.5 ± 12.7                          | 17.1 ± 11.6   | 15.9 ± 11.1   | 14.6 ± 10.5   | 0.1     |   | 6.8 ± 6.4                            | 9.3 ± 7.9     | 9.5 ± 11.3   | <0.0001 |
| Charlson comorbidity score                   | 1.3 ± 1.5                            | 1.1 ± 1.3     | 0.8 ± 1.1     | 0.8 ± 1.1     | 0.0008  |   | 1.2 ± 1.4                            | 1.1 ± 1.23    | 0.8 ± 1.0    | 0.08    |
| Glucose-lowering drugs                       |                                      |               |               |               |         |   |                                      |               |              | <0.0001 |
| None                                         |                                      |               |               |               |         |   | 27.1                                 | 13.8          | 0            |         |
| Metformin only                               |                                      |               |               |               |         |   | 10.3                                 | 6.2           | 5.6          |         |
| Insulin only                                 |                                      |               |               |               |         |   | 3.8                                  | 17.2          | 38.9         |         |
| Insulin + NIGLD                              |                                      |               |               |               |         |   | 4.9                                  | 15.2          | 33.3         |         |
| Sulfonylureas only                           |                                      |               |               |               |         |   | 28.5                                 | 18.6          | 11.1         |         |
| Sulfonylureas + other NIGLD                  |                                      |               |               |               |         |   | 24.9                                 | 29.0          | 11.1         |         |
| Other                                        |                                      |               |               |               |         |   | 0.5                                  | 0             | 0            |         |
| <b>Year 2005</b>                             |                                      |               |               |               |         |   |                                      |               |              |         |
| N (%)                                        | 8004<br>(88.29)                      | 661<br>(7.29) | 192<br>(2.12) | 209<br>(2.31) |         |   | 96017<br>(99.49)                     | 404<br>(0.42) | 93<br>(0.10) |         |
| Age, years                                   | 47.8 ± 17.6                          | 42.1 ± 17.3   | 40.6 ± 17.3   | 37.6 ± 15.0   | <0.0001 |   | 66.3 ± 13.1                          | 62.4 ± 15.0   | 57.5 ± 16.4  | <0.0001 |
| Male                                         | 58.4                                 | 54.2          | 54.7          | 47.4          | 0.002   |   | 54.5                                 | 46.5          | 35.5         | <0.0001 |
| Duration of recorded diabetes history, years | 19.1 ± 13.5                          | 17.2 ± 12.3   | 18.5 ± 12.1   | 15.2 ± 11.2   | <0.0001 |   | 6.8 ± 6.4                            | 9.9 ± 8.1     | 11.7 ± 11.0  | <0.0001 |
| Charlson comorbidity score                   | 1.7 ± 1.6                            | 1.5 ± 1.5     | 1.5 ± 1.5     | 1.5 ± 1.5     | 0.004   |   | 1.6 ± 1.5                            | 1.8 ± 1.7     | 1.6 ± 1.5    | 0.04    |
| Glucose-lowering drugs                       |                                      |               |               |               |         |   |                                      |               |              | <0.0001 |
| None                                         |                                      |               |               |               |         |   | 25.0                                 | 5.9           | 4.3          |         |
| Metformin only                               |                                      |               |               |               |         |   | 21.5                                 | 7.4           | 4.3          |         |
| Insulin only                                 |                                      |               |               |               |         |   | 4.2                                  | 25.7          | 36.6         |         |
| Insulin + NIGLD                              |                                      |               |               |               |         |   | 10.0                                 | 34.9          | 47.3         |         |
| Sulfonylureas only                           |                                      |               |               |               |         |   | 8.8                                  | 4.0           | 2.2          |         |
| Sulfonylureas + other NIGLD                  |                                      |               |               |               |         |   | 25.9                                 | 18.8          | 5.4          |         |
| Other                                        |                                      |               |               |               |         |   | 5.0                                  | 3.2           | 0            |         |
| <b>Year 2013</b>                             |                                      |               |               |               |         |   |                                      |               |              |         |
| N (%)                                        | 8189<br>(88.51)                      | 730<br>(7.89) | 171<br>(1.85) | 162<br>(1.75) |         |   | 134076<br>(99.66)                    | 394<br>(0.29) | 66<br>(0.05) |         |
| Age, years                                   | 45.6 ± 17.3                          | 41.0 ± 16.5   | 41.1 ± 16.8   | 38.1 ± 13.8   | <0.0001 |   | 66.7 ± 13.4                          | 62.6 ± 15.1   | 58.9 ± 16.8  | <0.0001 |
| Male                                         | 58.3                                 | 57.1          | 51.5          | 46.9          | 0.009   |   | 55.8                                 | 49.8          | 28.8         | <0.0001 |

## SUPPLEMENTARY DATA

|                                              |             |             |             |             |         |           |            |             |         |
|----------------------------------------------|-------------|-------------|-------------|-------------|---------|-----------|------------|-------------|---------|
| Duration of recorded diabetes history, years | 20.8 ± 14.3 | 16.7 ± 12.2 | 20.3 ± 13.0 | 17.7 ± 10.0 | <0.0001 | 8.7 ± 6.8 | 12.1 ± 8.5 | 15.8 ± 10.1 | <0.0001 |
| Charlson comorbidity score                   | 2.7 ± 1.5   | 2.6 ± 1.4   | 2.7 ± 1.5   | 2.8 ± 1.6   | 0.36    | 2.9 ± 1.8 | 3.4 ± 2.1  | 3.6 ± 1.9   | <0.0001 |
| Glucose-lowering drugs                       |             |             |             |             |         |           |            |             | <0.0001 |
| None                                         |             |             |             |             |         | 22.1      | 3.6        | 3.0         |         |
| Metformin only                               |             |             |             |             |         | 29.7      | 6.6        | 1.5         |         |
| Insulin only                                 |             |             |             |             |         | 3.7       | 28.9       | 47.0        |         |
| Insulin + NIGLD                              |             |             |             |             |         | 10.6      | 43.9       | 43.9        |         |
| Sulfonylureas only                           |             |             |             |             |         | 3.7       | 2.3        | 1.5         |         |
| Sulfonylureas + other NIGLD                  |             |             |             |             |         | 23.6      | 10.9       | 3.0         |         |
| Other                                        |             |             |             |             |         | 6.7       | 3.8        | 0           |         |

DKA, diabetic ketoacidosis; NIGLD, non-insulin glucose lowering drug; T1DM, type 1 diabetes mellitus; T2DM; type 2 diabetes mellitus.

Values were mean ± standard deviation or percentage unless otherwise specified.

SUPPLEMENTARY DATA

**Supplementary Table 5.** Grouping adults with T1DM according to the number of hospital admission for DKA by year

| year | N    | Number of DKA hospital admissions |     |    |    |
|------|------|-----------------------------------|-----|----|----|
|      |      | 0                                 | 1   | 2  | ≥3 |
| 1998 | 4889 | 4823                              | 54  | 6  | 6  |
| 1999 | 6126 | 6034                              | 77  | 11 | 4  |
| 2000 | 7025 | 6900                              | 106 | 12 | 7  |
| 2001 | 7841 | 7708                              | 109 | 12 | 12 |
| 2002 | 8451 | 8283                              | 142 | 17 | 9  |
| 2003 | 8605 | 8417                              | 166 | 16 | 6  |
| 2004 | 8935 | 8778                              | 131 | 17 | 9  |
| 2005 | 9066 | 8878                              | 160 | 14 | 14 |
| 2006 | 9284 | 9055                              | 183 | 27 | 19 |
| 2007 | 9593 | 9329                              | 207 | 35 | 22 |
| 2008 | 9718 | 9454                              | 205 | 35 | 24 |
| 2009 | 9780 | 9523                              | 210 | 26 | 21 |
| 2010 | 9927 | 9642                              | 234 | 33 | 18 |
| 2011 | 9717 | 9458                              | 209 | 28 | 22 |
| 2012 | 9465 | 9212                              | 196 | 36 | 21 |
| 2013 | 9252 | 8989                              | 211 | 31 | 21 |

SUPPLEMENTARY DATA

**Supplementary Table 6.** Grouping adults with T2DM according to the number of hospital admission for DKA by year

| year | N      | Number of DKA hospital admissions |     |    |
|------|--------|-----------------------------------|-----|----|
|      |        | 0                                 | 1   | ≥2 |
| 1998 | 28019  | 28003                             | 16  | 0  |
| 1999 | 37327  | 37311                             | 16  | 0  |
| 2000 | 47105  | 47081                             | 24  | 0  |
| 2001 | 57419  | 57391                             | 25  | 3  |
| 2002 | 68383  | 68343                             | 37  | 3  |
| 2003 | 77130  | 77086                             | 42  | 2  |
| 2004 | 87546  | 87497                             | 46  | 3  |
| 2005 | 96514  | 96467                             | 43  | 4  |
| 2006 | 105141 | 105079                            | 54  | 8  |
| 2007 | 113736 | 113645                            | 85  | 6  |
| 2008 | 120959 | 120863                            | 91  | 5  |
| 2009 | 126746 | 126649                            | 86  | 11 |
| 2010 | 133397 | 133298                            | 87  | 12 |
| 2011 | 134865 | 134768                            | 88  | 9  |
| 2012 | 134828 | 134710                            | 109 | 9  |
| 2013 | 134536 | 134433                            | 95  | 8  |

**Supplementary Table 7.** The 30-day all-cause readmission rate for hospital admission for DKA during the entire study period, 1998-2013

|      | All                            |                     | Include only the first readmission in each year from each patient |                    | Include only the first readmission from each patient |                    |
|------|--------------------------------|---------------------|-------------------------------------------------------------------|--------------------|------------------------------------------------------|--------------------|
|      | Total number of DKA admissions | Readmission rate, % | Total number of DKA admissions                                    | Readmission rate,% | Total number of DKA admissions                       | Readmission rate,% |
| T1DM | 4346                           | 12.67               | 3196                                                              | 9.39               | 2214                                                 | 6.05               |
| T2DM | 1148                           | 6.18                | 1029                                                              | 5.05               | 883                                                  | 3.74               |



## SUPPLEMENTARY DATA

**Supplementary Table 8.** The outcomes of patients according to different number of hospital admission for DKA\*

|                            | The number of DKA hospital admissions in T1DM |                   |                   | The number of DKA hospital admissions in T2DM |                   |
|----------------------------|-----------------------------------------------|-------------------|-------------------|-----------------------------------------------|-------------------|
|                            | 1                                             | 2                 | ≥3                | 1                                             | ≥2                |
| Length of hospital stay    | Ref.                                          | 0.93 (0.85, 1.01) | 1.09 (0.96, 1.23) | Ref.                                          | 1.09 (0.88, 1.33) |
| 30-day all-cause mortality | Ref.                                          | 0.52 (0.22, 1.26) | 1.34 (0.66, 2.71) | Ref.                                          | 1.70 (0.73, 3.97) |
| 1-year all-cause mortality | Ref.                                          | 0.90 (0.65, 1.25) | 1.90 (1.15, 3.13) | Ref.                                          | 2.05 (1.16, 3.62) |

\* We used negative binomial models for length of hospital stay in days (continuous variable) and logistic models for 30-day and 1-year all-cause mortality. The estimates were adjusted for calendar year, age, gender, duration of recorded diabetes history, and Charlson comorbidity score. For T2DM, we additionally adjusted for glucose-lowering medications. Robust error variance was applied to account for recurrent DKA admissions.

**Supplementary Table 9.** Key characteristics for T1DM adults over time

| year | Number of patients | Number of DKA admissions | Person years with diabetes | Percent of patients with duration of recorded diabetes history <1 year | Percent male | Percent of patients aged 18-24 years |
|------|--------------------|--------------------------|----------------------------|------------------------------------------------------------------------|--------------|--------------------------------------|
| 1998 | 4889               | 93                       | 3972.33                    | 3.64                                                                   | 56.78        | 8.02                                 |
| 1999 | 6126               | 124                      | 4956.78                    | 4.52                                                                   | 57.15        | 7.56                                 |
| 2000 | 7025               | 161                      | 6073.28                    | 4.88                                                                   | 57.57        | 7.57                                 |
| 2001 | 7841               | 188                      | 6732.55                    | 4.73                                                                   | 57.53        | 7.77                                 |
| 2002 | 8451               | 211                      | 7384.20                    | 4.41                                                                   | 57.39        | 7.89                                 |
| 2003 | 8605               | 225                      | 7700.73                    | 3.38                                                                   | 57.83        | 8.46                                 |
| 2004 | 8935               | 205                      | 7920.67                    | 3.46                                                                   | 58.19        | 8.91                                 |
| 2005 | 9066               | 242                      | 8100.24                    | 3.32                                                                   | 57.77        | 9.08                                 |
| 2006 | 9284               | 312                      | 8316.45                    | 3.39                                                                   | 57.81        | 9.88                                 |
| 2007 | 9593               | 364                      | 8572.82                    | 3.18                                                                   | 57.93        | 10.41                                |
| 2008 | 9718               | 377                      | 8683.64                    | 3.00                                                                   | 58.06        | 10.38                                |
| 2009 | 9780               | 380                      | 8796.86                    | 2.85                                                                   | 58.23        | 11.01                                |
| 2010 | 9927               | 396                      | 8746.30                    | 2.73                                                                   | 58.35        | 11.16                                |
| 2011 | 9717               | 347                      | 8551.30                    | 2.64                                                                   | 58.47        | 12.02                                |
| 2012 | 9465               | 363                      | 8438.59                    | 2.87                                                                   | 58.14        | 11.98                                |
| 2013 | 9252               | 353                      | 8311.70                    | 2.64                                                                   | 57.85        | 12.47                                |

## SUPPLEMENTARY DATA

**Supplementary Figure 1.** Trends in hospital admission for diabetic ketoacidosis in T1DM adults, by age (1A), gender (1B), duration of recorded diabetes history (1C), Charlson comorbidity score (1D), and region (1E)

### 1A

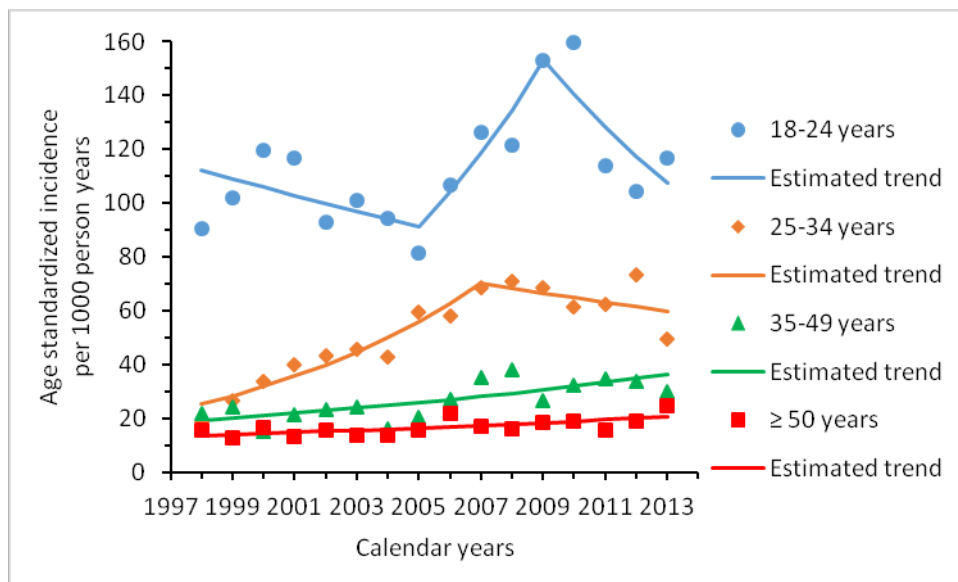

### 1B

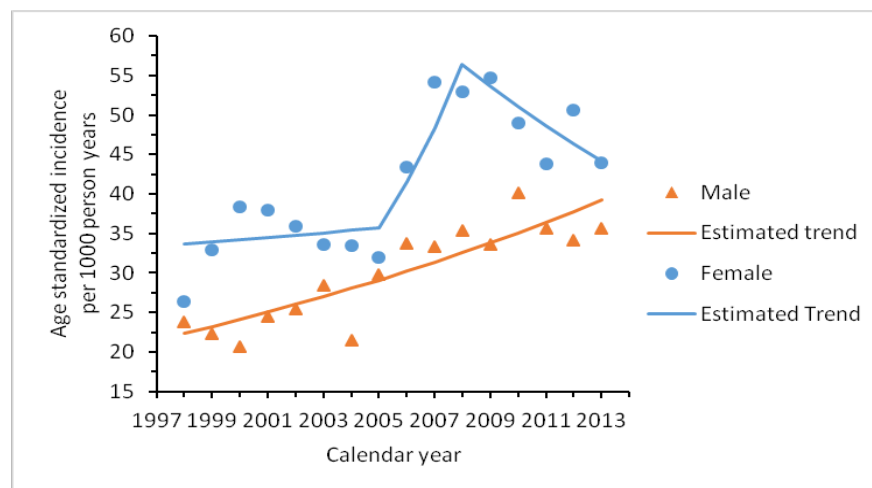

SUPPLEMENTARY DATA

1C

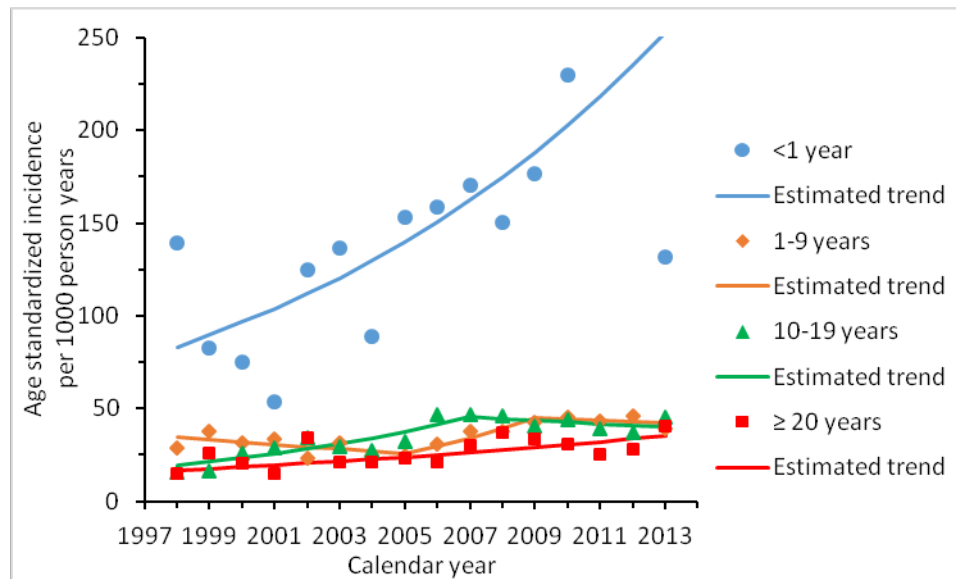

SUPPLEMENTARY DATA

1D

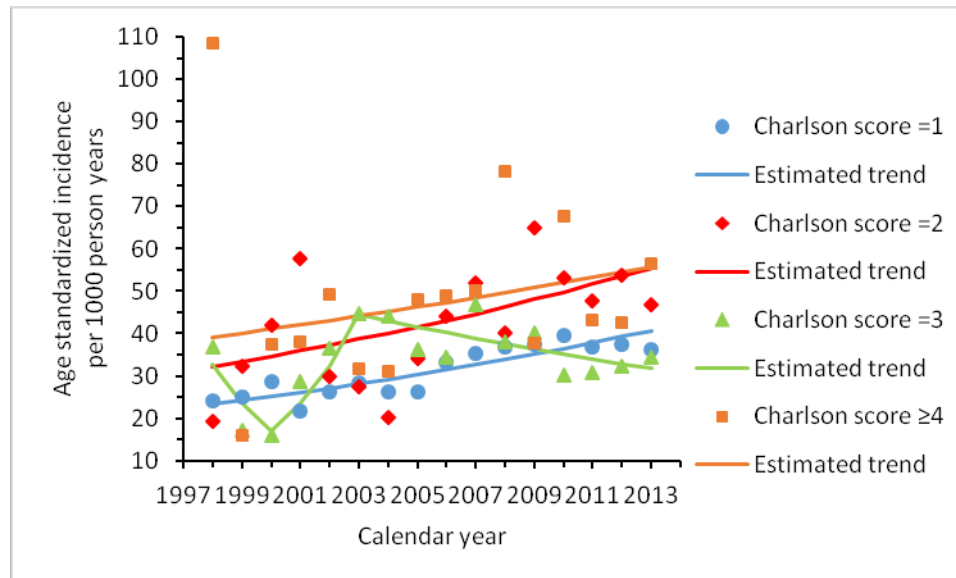

SUPPLEMENTARY DATA

1E

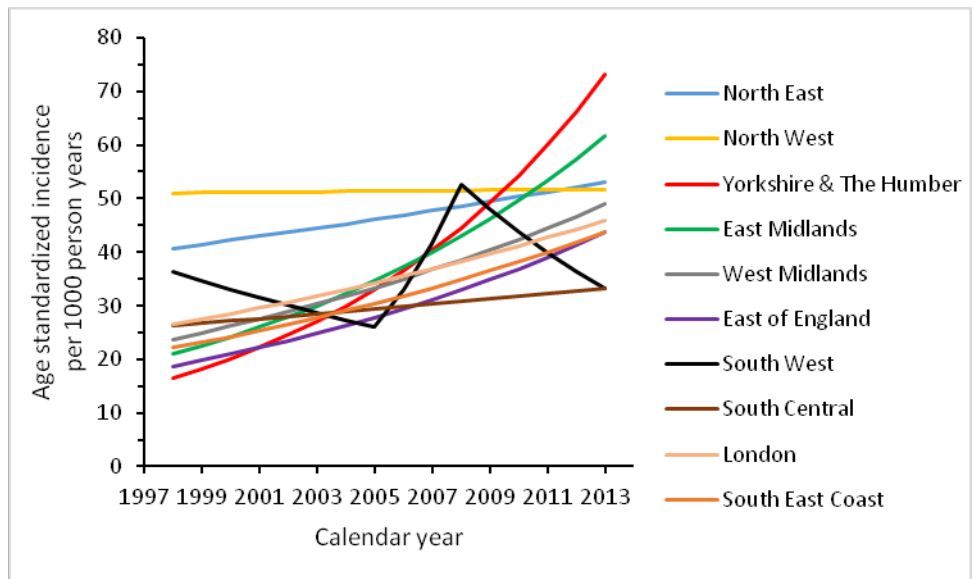

Figure 1E shows the estimated DKA trends in 10 regions in England. Due to the large number of the subgroups, the observed age standardized incidence rates were not plotted. They can be found in supplementary Table 1.

SUPPLEMENTARY DATA

**Supplementary Figure 2.** Trends in hospital admission for diabetic ketoacidosis in T2DM adults, by age (2A), gender (2B), duration of recorded diabetes history (2C), Charlson comorbidity score (2D), current use of glucose-lowering drugs (2E), and region (2F)

2A

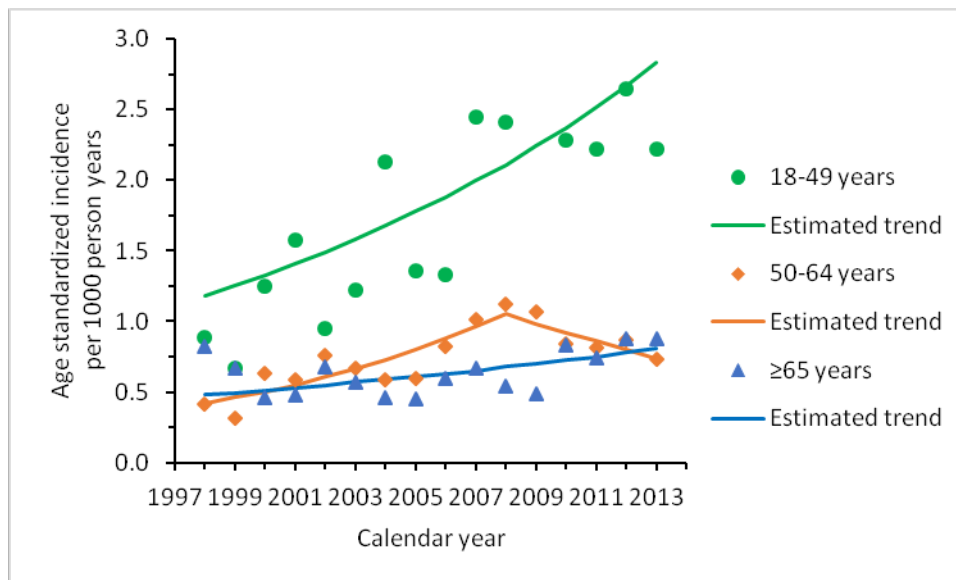

2B

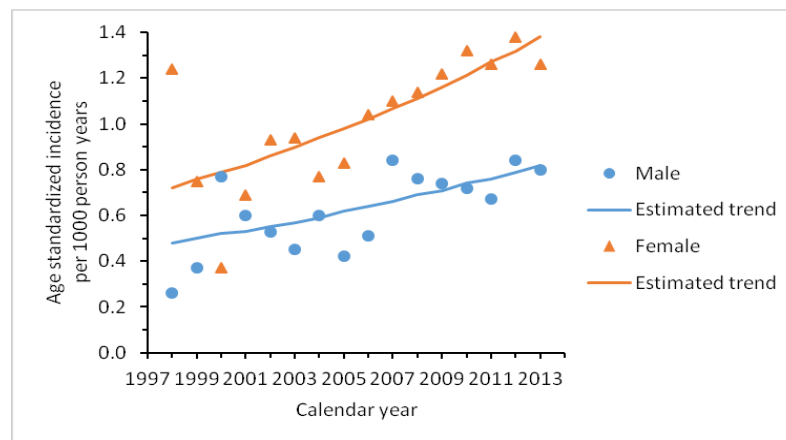

SUPPLEMENTARY DATA

2C

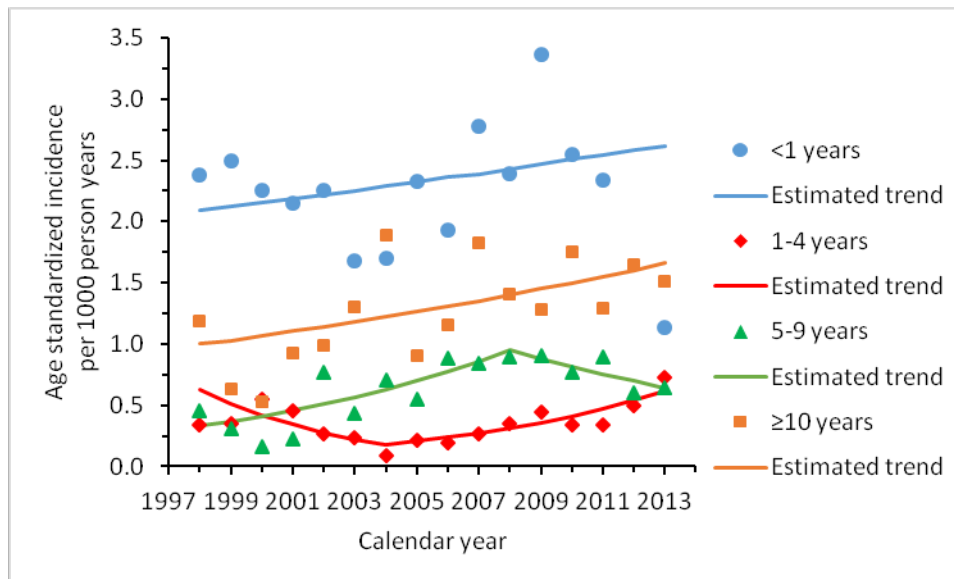

2D

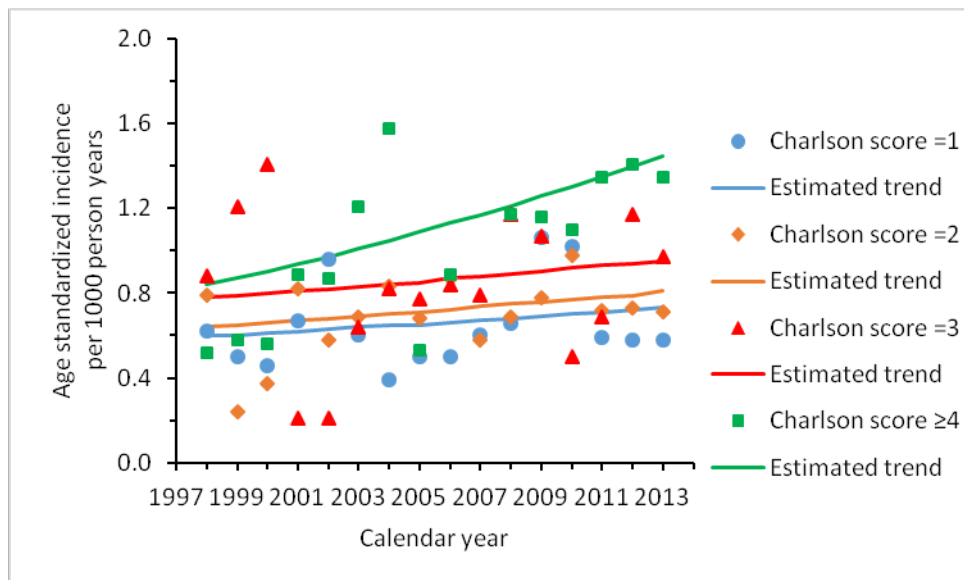

SUPPLEMENTARY DATA

2E

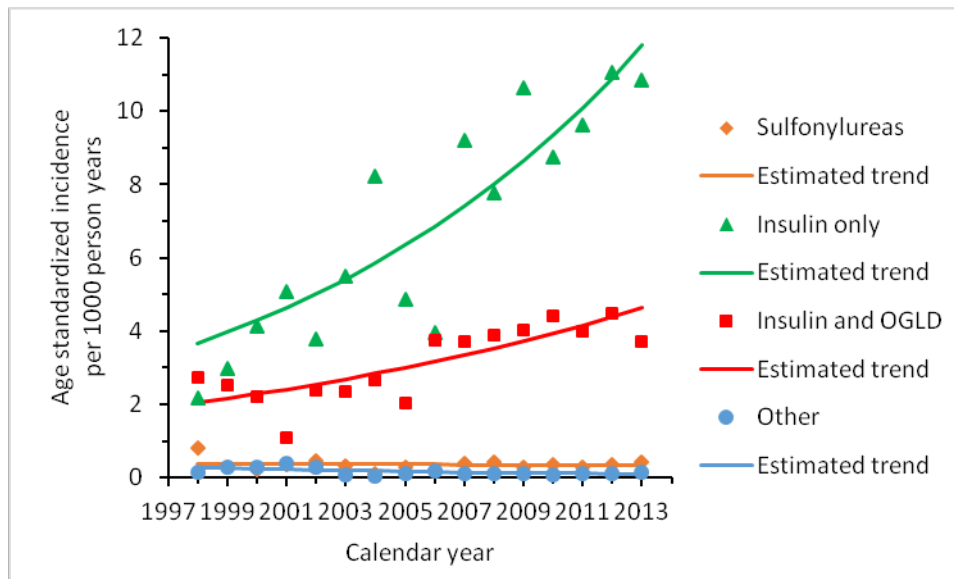

2F

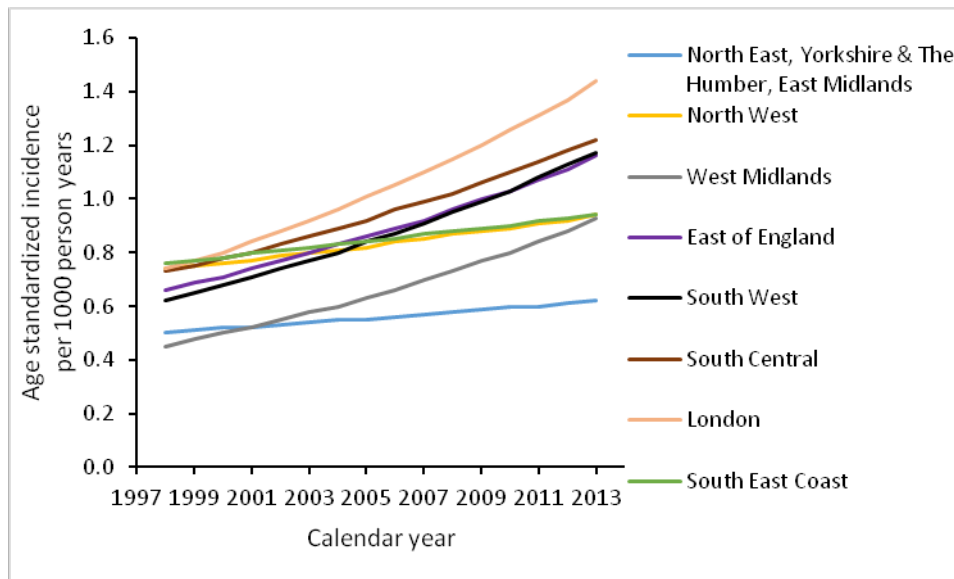



## SUPPLEMENTARY DATA

Figure 2F shows the estimated DKA trends in 10 regions in England. Due to the large number of the subgroups, the observed age standardized incidence rates were not plotted. They can be found in supplementary Table 2.

**Supplementary Figure. 3.** Trends in hospital admission for diabetic ketoacidosis in T1DM adults, after excluding the year 2004 data

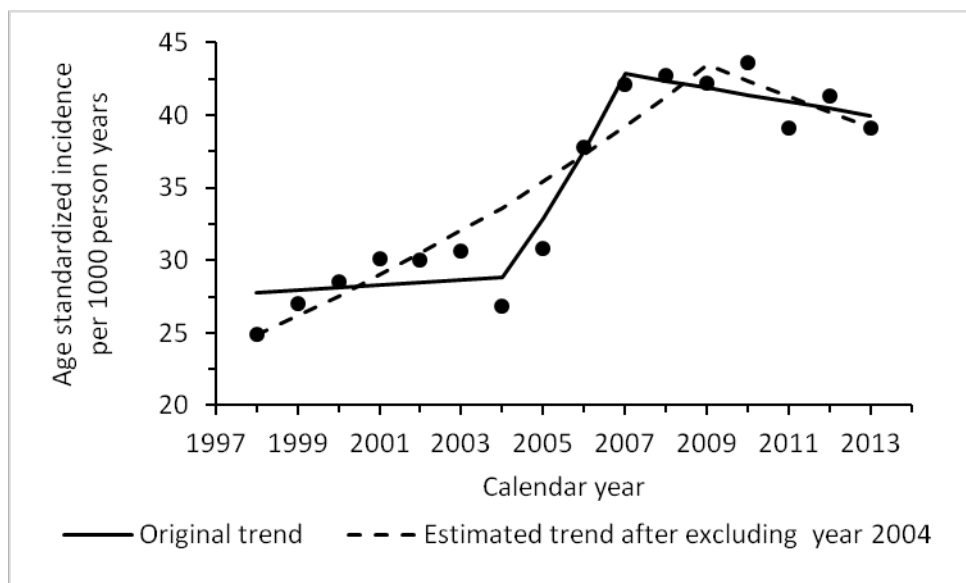

Black dots represented age standardized incidence rate in each year. The standard population for calculating age standardized incidence was the entire cohort of adults with T1DM during the study period. The following age categories were used: 18-24, 25-34, 35-49, and  $\geq 50$  years.

## SUPPLEMENTARY DATA

**Supplementary Figure. 4A.** Trends in hospital admission for DKA in T1DM adults, with analyzing only the first DKA admission during the study period from each patient

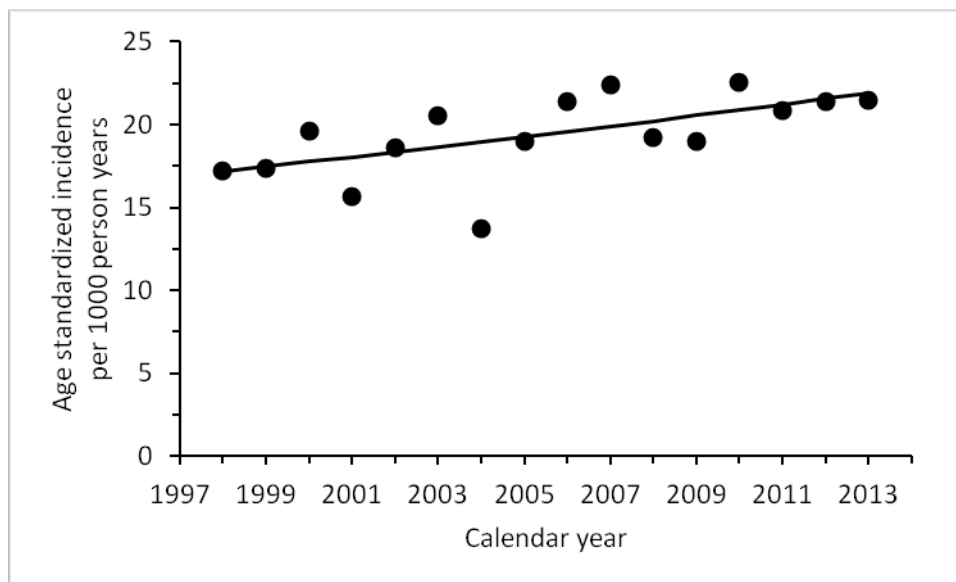

**Supplementary Figure. 4B.** Trends in hospital admission for DKA in T2DM adults, with analyzing only the first DKA admission during the study period from each patient

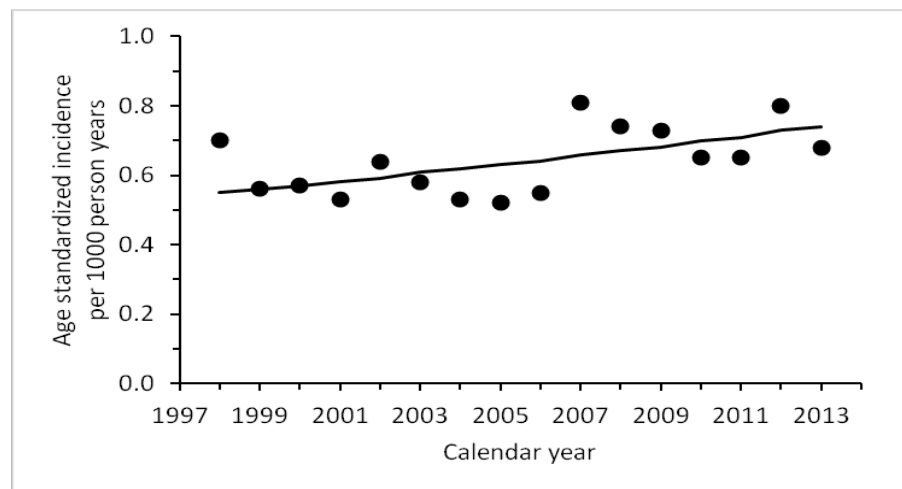

## SUPPLEMENTARY DATA

APC, annual percent change. Black dots represented age standardized incidence rate in each year. Solid line represented estimated trend from using joinpoint regression. APC and 95% CI, along with P value for trend, were shown in the figure. The standard population for calculating age standardized incidence was the entire cohort of adults with T1DM or T2DM during the study period. For T1DM, the following age categories were used: 18-24, 25-34, 35-49, and  $\geq 50$  years. For T2DM, the following age categories were used: 18-49, 50-64, and  $\geq 65$  years.

**Supplementary Figure. 5A.** Trends in hospital admission for DKA in T1DM adults, with analyzing only the first DKA admission in each year from each patient

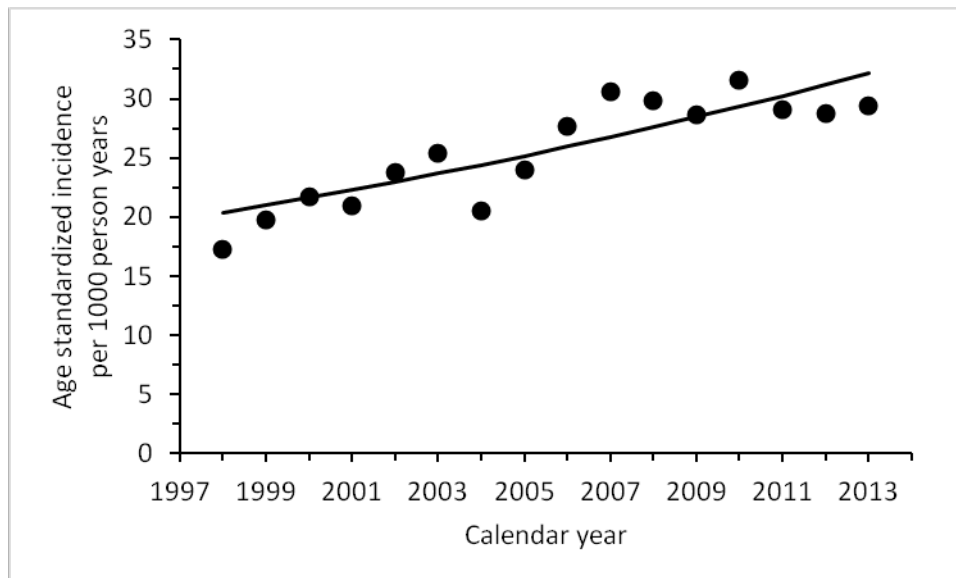

## SUPPLEMENTARY DATA

**Supplementary Figure 5B.** Trends in hospital admission for DKA in T2DM adults, with analyzing only the first DKA admission in each year from each patient

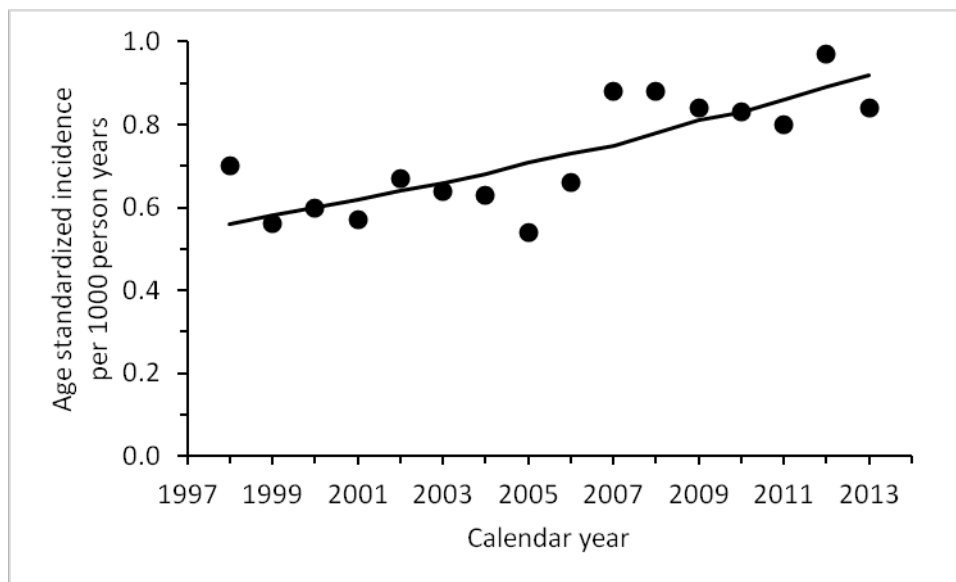

APC, annual percent change. Black dots represented age standardized incidence rate in each year. Solid line represented estimated trend from using joinpoint regression. APC and 95% CI, along with P value for trend, were shown in the figure. The standard population for calculating age standardized incidence was the entire cohort of adults with T1DM or T2DM during the study period. For T1DM, the following age categories were used: 18-24, 25-34, 35-49, and  $\geq 50$  years. For T2DM, the following age categories were used: 18-49, 50-64, and  $\geq 65$  years.

SUPPLEMENTARY DATA

**Supplementary Figure. 6A.** Trends in 30-day all-cause readmission rate for hospital admission for DKA when including only the first readmission in each year in each patient

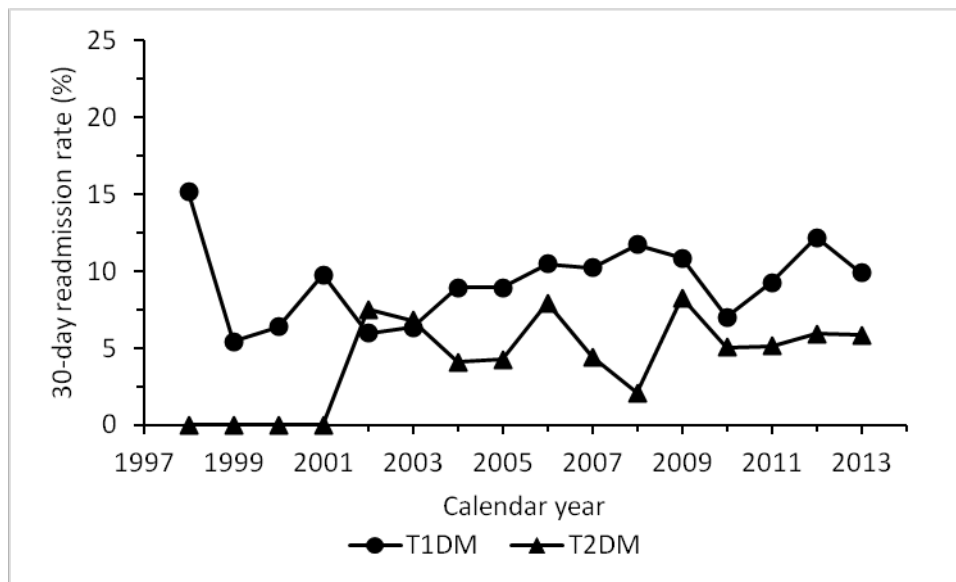

SUPPLEMENTARY DATA

**Supplementary Figure. 6B.** Trends in 30-day all-cause readmission rate for hospital admission for DKA when including only the first readmission in each patient

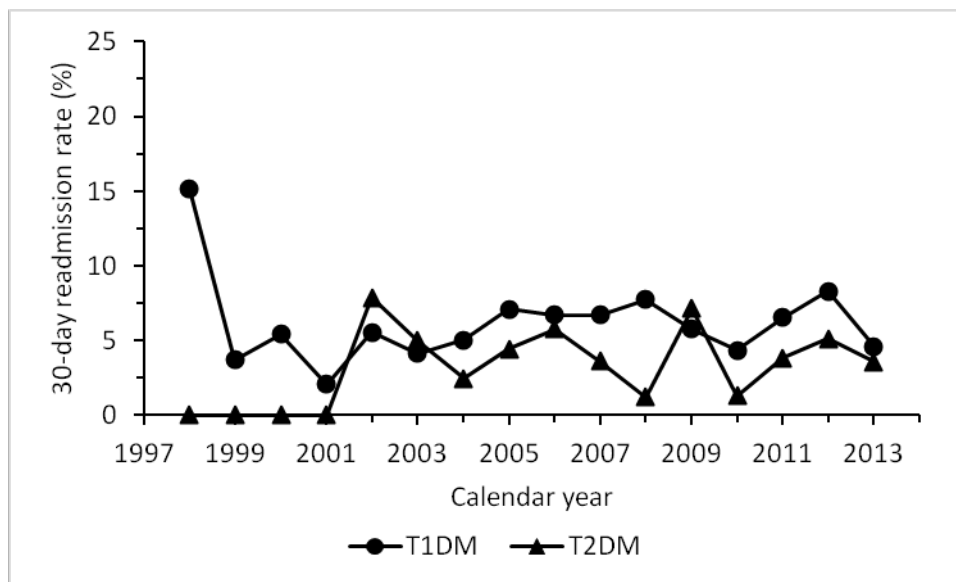

Estimates were obtained from logistic regression models with robust error variance to account for recurrent DKA admissions. Estimates were adjusted for calendar year, age, gender, duration of recorded diabetes history, Charlson comorbidity score, and current use of glucose-lowering drugs (for T2DM only).

SUPPLEMENTARY DATA

**Supplementary Figure. 7.** Proportion of T2DM adults with duration <1 year and  $\geq 10$  years, 1998-2013

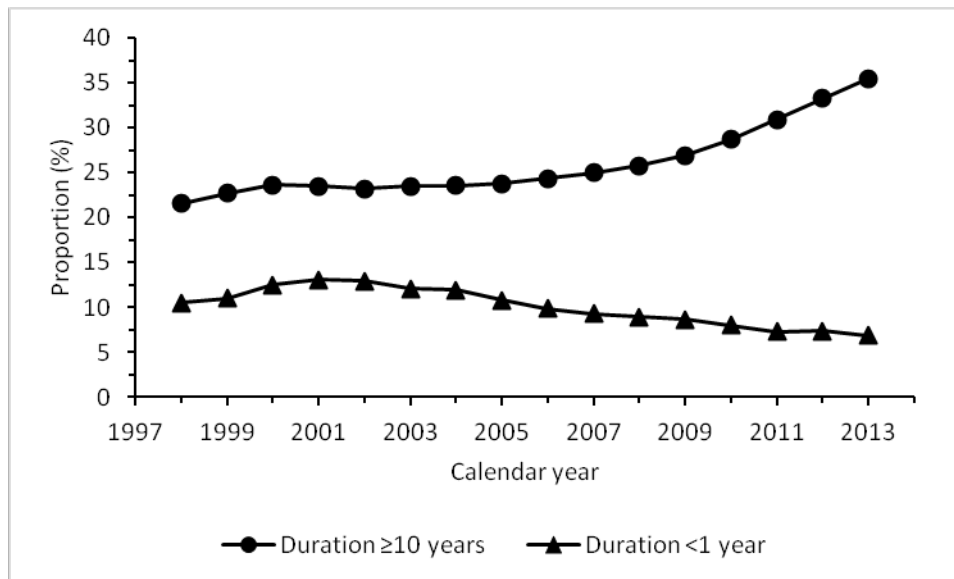

Supplement: dc171583supplementarydata.pdf [file dc171583supplementarydata.pdf]
